# Supplementary material for: Unraveling the low-temperature activity of Rh–CeO2 catalysts in CO oxidation: probing the local structure and Red-Ox transformation of Rh3+ species
Source: Royal Society of Chemistry journal article supplement (doi:10.1039/d2cp04503f), 2022-12-22
Supplement: d2cp04503f1.pdf [file d2cp04503f1.pdf]

## Supporting Information

### **Unraveling the low-temperature activity of Rh-CeO<sub>2</sub> catalysts in CO oxidation: probing the local structure and Red-Ox transformation of Rh<sup>3+</sup> species**

Elizaveta A. Fedorova\*,<sup>1</sup> Tatyana Yu. Kardash\*,<sup>2</sup> Lidiya S. Kibis,<sup>2</sup> Olga A. Stonkus,<sup>2</sup> Elena M. Slavinskaya,<sup>2</sup> Valery A. Svetlichnyi,<sup>3</sup> Simone Pollastri,<sup>4</sup> Andrei I. Boronin<sup>2</sup>

<sup>1</sup>Leibniz Institute for Catalysis, Albert-Einstein Str. 29a, 18059, Rostock, Germany

<sup>2</sup>Bereskov Institute of Catalysis, pr. Lavrentieva 5, 630090, Novosibirsk, Russia

<sup>3</sup>Tomsk State University, pr. Lenina 36, 634050 Tomsk, Russia

<sup>4</sup>Elettra-Sincrotrone Trieste S.C.p.A., Strada Statale 14, km 163.5, Basovizza, Trieste, I-34149, Italy

Corresponding Authors

\*e-mail: [Elizaveta.Fedorova@catalysis.de](mailto:Elizaveta.Fedorova@catalysis.de); [kardash@catalysis.ru](mailto:kardash@catalysis.ru)

### Estimation of the influence of mass transport and heat transfer limitation in the range of low CO conversion (below 15%).

To eliminate the possible influence of the mass transport and heat transfer limitation on the calculated values of the rate of the catalytic reaction we performed the corresponding estimations following the procedure described in works [1-3].

To estimate the influence of the internal diffusion we checked the Weisz modulus ( $\Phi$ ):

$\Phi = \frac{r_{obs} \times \rho_p \times d_p^2}{D_{eff} \times C_{CO}^{bulk}}$ , where  $r_{obs}$  = observed reaction rate, mol/kg<sub>cat</sub>·s;  $\rho_p$  = bulk density of catalyst bed, kg/m<sup>3</sup>;

$d_p$  = catalyst particle diameter, 0.2 mm;  $D_{eff}$  = effective diffusivity, m<sup>2</sup>/s; and  $C_{CO}^{bulk}$  = bulk gas concentration of CO, mol/m<sup>3</sup> (calculated as  $C_{CO}^{bulk} = \frac{P_{CO}}{R_g \times T}$ ,  $P_{CO}$  = 202.6 Pa,  $R_g$  = gas constant (8.314 J/mol·K),  $T$  = reaction temperature, K).

The corresponding parameters for the 5Rh-CeO<sub>2</sub> and 1Rh-CeO<sub>2</sub> catalysts are given in Table S1. The resulted  $\Phi$  value was 0.79 and 0.88, so, internal diffusion limitations can be discarded in accordance with the Weisz criterion ( $\Phi < 1$ ).

To estimate the influence of the external diffusion we compared the bulk gas concentration of CO ( $C_{CO}^{bulk}$ ) with the difference of CO concentration over the gas film ( $\Delta C_{CO}$ ):

$\Delta C_{CO} = \frac{r_{obs} \times d_p^2 \times \rho_p}{6 \times Sh \times D_{AB}}$ , where  $r_{obs}$  = observed reaction rate, mol/kg<sub>cat</sub>·s;  $d_p$  = catalyst particle diameter, 0.2 mm;  $\rho_p$  = bulk density of catalyst bed;  $D_{eff}$  = effective diffusivity, m<sup>2</sup>/s;  $Sh$  is the Sherwood number,  $D_{AB}$  = the binary gas diffusivity, m<sup>2</sup>/s.

The calculated value  $\Delta C_{CO} = 1.04 \times 10^{-4}$  and  $1.1 \times 10^{-4} \ll C_{CO}^{bulk}$ , thus, the external diffusion limitations can be discarded.

**Table S1.** Calculated parameters for internal and external diffusion.

| Sample               | $r_{obs}$ ,<br>mol/kg <sub>cat</sub> ·s | $\rho_p$ ,<br>kg/m <sup>3</sup> | $D_{eff}$ ,<br>m <sup>2</sup> /s | T, K | $C_{CO}^{bulk}$ ,<br>mol/m <sup>3</sup> | Sh  | $D_{AB}$<br>m <sup>2</sup> /s | $\Phi$ | $\Delta C_{CO}$ ,<br>mol/m <sup>3</sup> |
|----------------------|-----------------------------------------|---------------------------------|----------------------------------|------|-----------------------------------------|-----|-------------------------------|--------|-----------------------------------------|
| 5Rh-CeO <sub>2</sub> | $4.574 \times 10^{-4}$                  | 1888                            | $1.348 \times 10^{-7}$           | 300  | $8.12 \times 10^{-2}$                   | 1.5 | $3.7 \times 10^{-5}$          | 0.79   | $1.04 \times 10^{-4}$                   |
| 1Rh-CeO <sub>2</sub> | $4.854 \times 10^{-4}$                  | 1888                            | $1.422 \times 10^{-7}$           | 333  | $7.32 \times 10^{-2}$                   | 1.5 | $3.7 \times 10^{-5}$          | 0.88   | $1.1 \times 10^{-4}$                    |

To estimate the heat transfer limitations, we used the Mear's criterion [2,3].

$C_M = \left| \frac{-\Delta H r_{obs} \rho_p d_p E_a}{2hT^2 R_g} \right| < 0.15$ , where  $\Delta H$  = heat of reaction, kJ/mol;  $E_a$  = activation energy, kJ/mol;  $h$  = heat transfer coefficient between gas and pellet, kJ/m<sup>2</sup>·s·K,  $R_g$  = gas constant (8.314 J/mol·K),  $T$  = reaction temperature, K

The corresponding parameters for the 5Rh-CeO<sub>2</sub> and 1Rh-CeO<sub>2</sub> catalysts are given in Table S1, Table S2. The calculated value  $C_M = 4.67 \times 10^{-3}$  and  $4.16 \times 10^{-3} \ll 0.15$ , thus we can neglect the heat transfer effect during the kinetic experiments.

**Table S2.** Calculated parameters for heat transfer.

| Sample               | $\Delta H$ , kJ/mol | $E_a$ , kJ/mol | $h$ , kJ/m <sup>2</sup> ·s·K | T, K | $C_M$   |
|----------------------|---------------------|----------------|------------------------------|------|---------|
| 5Rh-CeO <sub>2</sub> | -283                | 38.9           | $6.5 \times 10^{-2}$         | 300  | 0.00467 |
| 1Rh-CeO <sub>2</sub> | -283                | 40.2           | $6.5 \times 10^{-2}$         | 333  | 0.00416 |

The adiabatic heating was also estimated. For the 5Rh-CeO<sub>2</sub> and 1Rh-CeO<sub>2</sub> catalysts the CO conversion 15% is reached at 27 and 60°C, respectively. For this temperature the adiabatic heating can be calculated as:  $\Delta T_{ad} = \Delta H C / (c_p \rho)$ , where  $\Delta H$  - heat of reaction, kJ/mol,  $C$  – reacted CO concentration = 0.013 mol/m<sup>3</sup>,  $c_p$  – specific heat = 1.043 (1.044) kJ/(kg deg),  $\rho$  – gas density - 1.123 (1.021) kg/m<sup>3</sup> at 27 (57) °C.

The calculated value  $\Delta T_{ad} = 3.2^\circ\text{C}$  and  $3.6^\circ\text{C}$ , thus, adiabatic heating at 27 and 57°C does not exceed 3.2 and 3.6°C.

[1] P.-A. Carlsson, V.P. Zhdanov, M. Skoglundh, *Phys. Chem. Chem. Phys.*, 2006, **8**, 2703-2706.

[2] A.I. Boronin, E.M. Slavinskaya, A. Figueroba, A.I. Stadnichenko, T.Y. Kardash, O.A. Stonkus, E.A. Fedorova, V.V. Muravev, V.A. Svetlichnyi, A. Bruix, K.M. Neyman, *Appl. Catal. B: Environ.*, 2021, **286**, 119931.

[3] H.-H. Liu, Y. Wang, A.-P. Jia, S.-Y. Wang, M.-F. Luo, J.-Q. Lu, *Appl. Surf. Sci.*, 2014, **314**, 725-734.

**Table S3.** Structural and microstructural characteristics of ceria in the Rh-CeO<sub>2</sub> catalysts, TOF at 25°C and activation energy (E<sub>a</sub>). a - is lattice parameter, D – is average crystallite size, e<sub>0</sub> - is microstrains of CeO<sub>2</sub> lattice.

| Sample               | a, Å     | D, nm  | e <sub>0</sub> , % | S, m <sup>2</sup> /g | TOF*10 <sup>3</sup> , s <sup>-1</sup> | E <sub>a</sub> , kcal/mol |
|----------------------|----------|--------|--------------------|----------------------|---------------------------------------|---------------------------|
| CeO <sub>2</sub>     | 5.416(1) | 7.3(3) | 0.10(2)            | 122                  | -                                     | -                         |
| 1Rh-CeO <sub>2</sub> | 5.411(1) | 6.6(3) | 0.12(3)            | 145                  | 0.90                                  | 9.6                       |
| 5Rh-CeO <sub>2</sub> | 5.403(2) | 7.2(3) | 0.18(3)            | 138                  | 0.86                                  | 9.3                       |

**Table S4.** Results of the fittings Rh K-edge EXAFS of the 5Rh-CeO<sub>2</sub> sample.

| Sample | Type    | R (Å)     | σ <sup>2</sup> (Å <sup>2</sup> ) | CN      | ΔE <sub>0</sub> (eV) | R <sub>f</sub> (%) | Rh <sup>0</sup> fraction* |
|--------|---------|-----------|----------------------------------|---------|----------------------|--------------------|---------------------------|
| init   | Rh-O    | 2.046 (2) | 0.0040 (2)                       | 5.5 (1) | -3.2 (4)             | 0.54               | -                         |
|        | Rh-O-Rh | 3.072 (7) | 0.0078 (7)                       | 2.0 (2) |                      |                    |                           |
|        | Rh-O-Ce | 3.18 (2)  | 0.007 (2)                        | 0.7 (3) |                      |                    |                           |
| Red-Ox | Rh-O    | 2.034 (2) | 0.0049 (3)                       | 5.3 (1) | -4.0 (4)             | 0.82               | -                         |
|        | Rh-O-Rh | 3.068 (6) | 0.0074 (6)                       | 2.1 (2) |                      |                    |                           |
|        | Rh-O-Ce | 3.15 (1)  | 0.007 (1)                        | 0.7 (1) |                      |                    |                           |
| Red    | Rh-O    | 2.028 (2) | 0.0042 (3)                       | 4.4 (1) | -4.7 (4)             | 0.99               | 0.18(1)                   |
|        | Rh-Rh   | 2.65 (1)  | 0.013 (1)                        | 2.0 (3) |                      |                    |                           |
|        | Rh-O-Rh | 3.09 (1)  | 0.008 (1)                        | 0.9 (2) |                      |                    |                           |
|        | Rh-O-Ce | 3.20 (1)  | 0.005 (1)                        | 0.5 (1) |                      |                    |                           |

\*Data were obtained by fitting of the XANES spectra of the 5Rh-CeO<sub>2</sub> catalysts with a linear combination of the XANES spectra of Rh foil and the Rh-CeO<sub>2</sub>-init sample like a reference of Rh metal and Rh<sup>3+</sup> highly dispersed species on CeO<sub>2</sub>, respectively.

CN=coordination number

**Table S5.** Hydrogen consumption during TPR-H<sub>2</sub>

| Sample               | T <sub>max-1</sub> , °C | T <sub>max-2</sub> , °C | H <sub>2</sub> consumed, μmol/g | H <sub>2</sub> /Rh |
|----------------------|-------------------------|-------------------------|---------------------------------|--------------------|
| 1Rh-CeO <sub>2</sub> | -                       | 100                     | 672                             | 6.9                |
| 5Rh-CeO <sub>2</sub> | 32                      | 75                      | 1740                            | 3.3                |

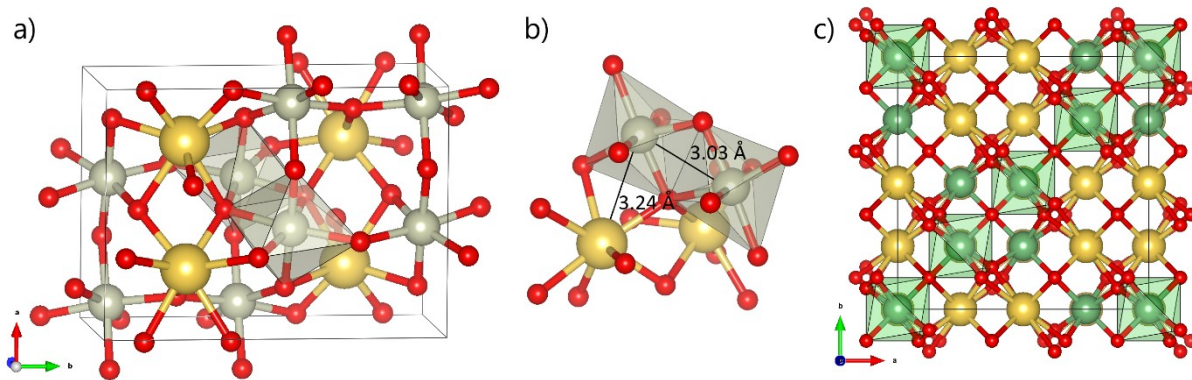

**Figure S1.** (a) Unit cell and (b) local structure of  $\text{CeRh}_2\text{O}_5$  oxide; (c) unit cell of  $\text{Ce}_2\text{Zr}_2\text{O}_7$  oxide with pyrochlore structure. Ce – yellow, Rh – gray, Zr – green, O – red.

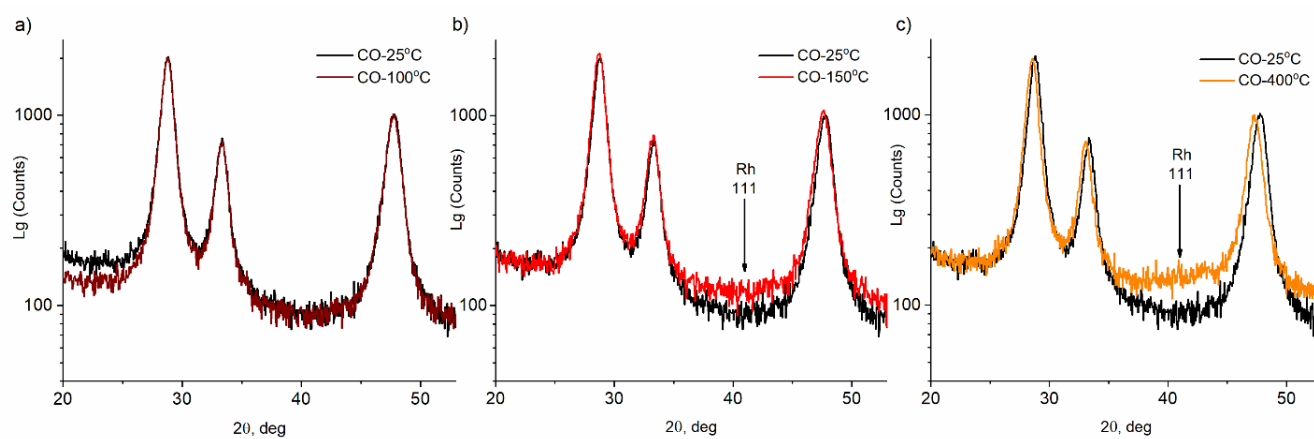

**Figure S2.** Comparison of the in situ XRD pattern of 5Rh- $\text{CeO}_2$  catalyst in CO collected at 25°C with in situ XRD patterns in CO collected at 100°C (a), 150°C (b) and 400°C.

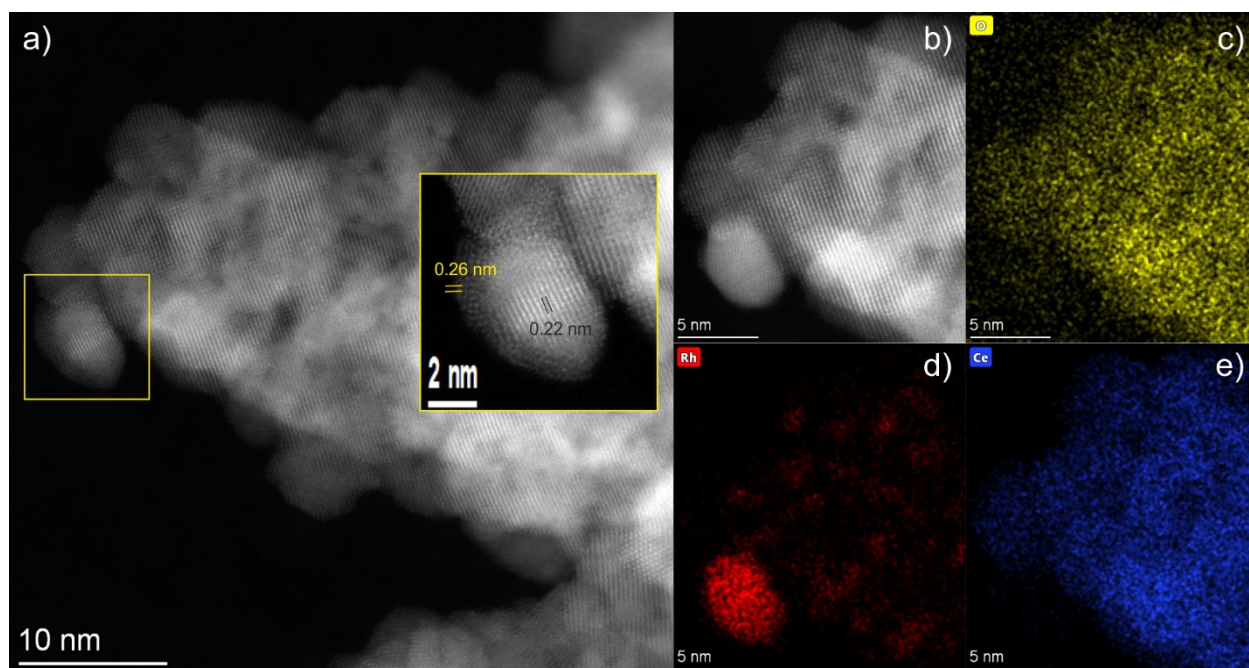

**Figure S3.** TEM data for the 5Rh–CeO<sub>2</sub> sample after the TPR-CO experiment: (a, b) HAADF-STEM image, EDX-mapping patterns showing distribution of (c) O (yellow color), (d) Rh (red color), (e) Ce (blue color) in area (b). The inset in figure (a) shows a magnified image of a core@shell Rh@RhO<sub>x</sub> nanoparticle with indication of interplanar distances. The oxidized “shell” layer disappeared during the EDX acquisition (figure b) due to reduction under the action of electron beam.

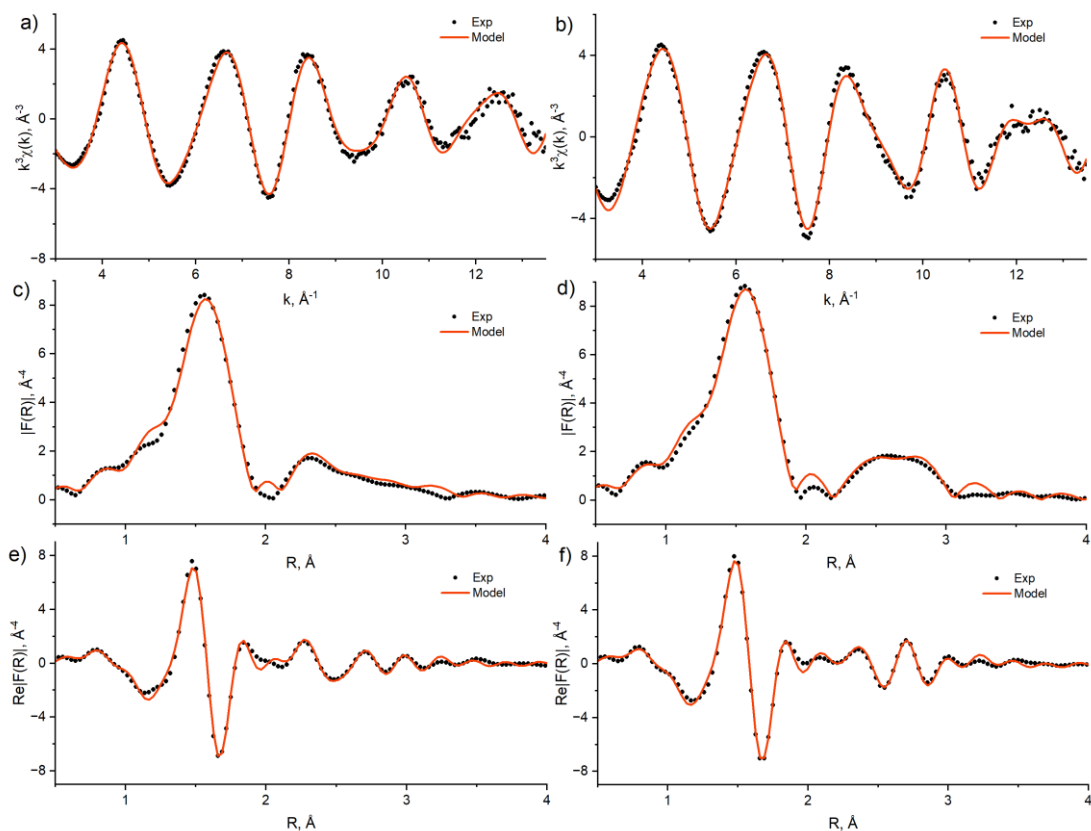

**Figure S4.** Rh K-edge  $k^3$ -weighted (a, b)  $\chi(k)$  EXAFS spectra and its Fourier transformed (c, d) magnitude and (e, f) real part for the 5Rh-CeO<sub>2</sub> sample after (a, c, e) TPR-CO experiment (Red) and after (b, d, f) TPR-CO experiment followed by TPO experiment (Red-Ox). Experimental curves - black dots; corresponding fits - solid red curves.

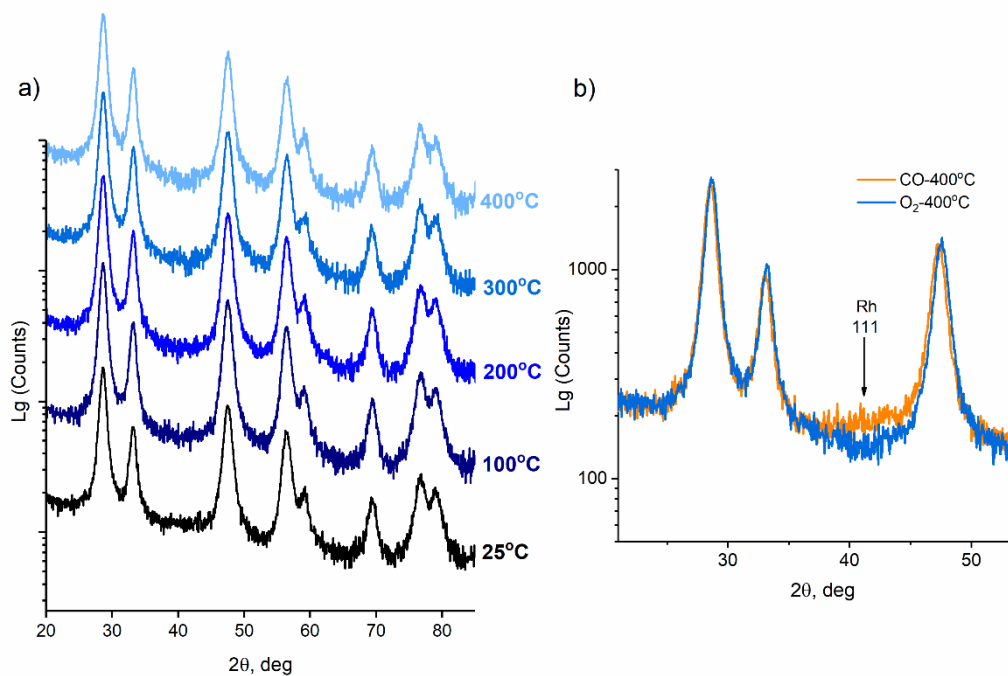

**Figure S5.** (a) In situ XRD patterns of the 5Rh-CeO<sub>2</sub> catalyst O<sub>2</sub> exposure. (b) Comparison of the in situ XRD pattern of the 5Rh-CeO<sub>2</sub> catalyst in CO at 400°C with in situ XRD pattern of the sample in O<sub>2</sub> at 400°C. After reoxidation Rh metal reflection disappeared, which indicates oxidation of Rh metal nanoparticles.
